# Supplementary material for: Retro-MTGR: Molecule Retrosynthesis Prediction via Multi-Task Graph Representation Learning
Source: Research Square preprint supplement (doi:10.21203/rs.3.rs-3205328/v1), 2023-09-06
Supplement: Supplementary file 1 [file 6d381ac4a39fa351f7a68c1c.xlsx]

## Sheet: EP
Substructure	Electrical property
*SS	+		Note：In terms of chemical symbols, C stands for carbon atom; c is a carbon atom in an aromatic bond; C N stands for nitrogen atom; n is a nitrogen atom with an aromatic bond; O for oxygen; S for sulfur; ~ indicates aromatic bonds; - represents a single bond; = double bond; # for three bonds.
*SN	+
*SC	-
*Sc	-
*S(O)O	+
*S(N)=O	+
*S(N)(N)=O	+
*S(n)(N)=O	+
*S(N)(=O)O	++
*S(N)(=O)Cl	+
*S(N)(=O)=O	++
*S(n)(=O)=O	++
*S(F)(F)(F)(F)F	++		The first atom symbol in each row on the right of '*' is the site atom.
*S(c)O	+
*S(C)N	+
*S(c)N	+
*S(c)C	-
*S(C)c	-
*S(C)C	-
*S(c)c	-
*S(C)=O	+
*S(c)=O	+
*S(c)(N)=O	++
*S(C)(N)=O	++
*S(c)(n)=O	++
*S(C)(n)=O	+
*S(c)(F)(F)(F)F	++
*S(c)(c)=O	+
*S(C)(C)=O	+
*S(C)(c)=O	++
*S(c)(C)=O	+
*S(c)(C)=N	+
*S(C)(C)=N	+
*S(C)(c)=N	-
*S(C)(=O)O	+
*S(c)(=O)O	+
*S(C)(=O)F	++
*S(c)(=O)F	+
*S(c)(=O)Cl	+
*S(c)(=O)=O	++
*S(C)(=O)=O	++
*S(C)(=O)[O-]	+
*S(C)(=N)=O	+
*S(c)(=N)=O	+
*S(=O)O	+
*S(=O)(O)O	+
*S(=O)(=O)O	++
*S(=O)(=O)F	++
*S(=O)(=O)Cl	+
*S(=O)(=O)[O-]	++
*S	-
*P(O)(O)O	+
*P(C)(O)O	+
*P(c)(O)O	+
*P(C)(C)O	-
*P(c)(C)C	-
*P(C)(C)C	-
*P(C)(c)C	-
*P(C)(C)=O	+
*P(c)(C)=O	+
*P(C)(=O)O	++
*P(c)(=O)O	+
*P(=O)(O)O	++
*OS	-
*OP	-
*OO	-
*ON	-
*On	-
*OC	-
*Oc	-
*O[SiH2]	-
*O[Si]	+
*O[N+]	+
*O	+
*NS	-
*NO	+
*NN	-
*Nn	-
*Nc	-
*NC	-
*N1CC1	-
*N=S	-
*N=O	+
*N=N	--
*N=C	--
*N=c	-
*N=[N+]	+
*N[N+]	++
*N(S)S	-
*N(O)S	-
*N(n)S	-
*N(N)S	-
*n(n)n	-
*N(C)S	-
*N(c)S	-
*n(c)s	-
*N(C)O	+
*N(c)O	+
*n(c)n	-
*N(C)N	-
*N(c)N	-
*N(C)n	-
*N(c)n	-
*N(C)C	-
*N(c)C	-
*n(c)c	-
*N(C)[SiH]	-
*N(C)[Se]	-
*n(c)[nH]	-
*n([n+])n	++
*N	-
*I	--
*F	+
*CS	+
*CP	+
*CO	+
*CN	+
*Cn	+
*Cl	-
*CI	+
*CF	+
*CCl	-
*Cc	-
*CC	+
*CBr	+
*CB	+
*C1CO1	--
*C1CN1	+
*C1CC1	-
*C1=CC1	-
*C1(S)CC1	-
*C1(O)CC1	-
*C1(N)CC1	-
*C1(F)CC1	+
*C1(Cl)CC1	--
*C1(C)N=N1	-
*C1(c)N=N1	-
*C1(c)CC1	--
*C=O	++
*C=N	+
*C=C	-
*C[Sn]	+
*C[SiH3]	+
*C[Si]	+
*C[P+]	+
*C[N+]	++
*C(S)S	+
*C(O)S	+
*C(O)O	+
*c(o)o	+
*C(O)F	++
*C(O)Cl	+
*C(O)=S	++
*C(O)(O)F	+
*C(O)(F)F	+
*C(O)(F)Cl	++
*c(n)s	+
*C(N)S	+
*c(n)s	+
*C(n)S	+
*C(N)S	+
*C(N)P	+
*C(N)O	++
*C(n)O	+
*C(N)O	+
*C(N)N	+
*c(n)n	+
*C(N)n	+
*C(n)N	+
*C(n)F	+
*C(N)Cl	+
*C(N)=S	+
*C(N)=O	++
*C(n)=O	+
*c(n)[nH]	+
*C(N)(N)N	+
*C(n)(N)N	+
*C(N)(F)F	+
*C(F)S	+
*C(F)F	+
*C(F)Br	++
*C(F)(F)S	++
*C(F)(F)P	++
*C(F)(F)F	++
*C(F)(F)Cl	++
*C(F)(F)Br	+
*C(Cl)Cl	+
*C(Cl)(Cl)Cl	++
*c(c)s	+
*C(C)S	+
*C(c)S	+
*C(C)P	+
*C(c)O	-
*C(C)O	+
*c(c)o	+
*c(c)n	+
*C(C)N	+
*C(c)N	+
*c(c)n	+
*C(c)n	+
*C(C)n	+
*C(c)n	+
*C(c)F	+
*C(C)F	+
*C(c)F	+
*C(c)Cl	+
*C(C)Cl	+
*c(c)c	-
*C(C)C	-
*C(c)c	+
*C(c)C	-
*C(C)Br	+
*C(c)Br	+
*C(C)=S	+
*C(c)=S	+
*C(C)=O	++
*C(c)=O	-
*C(c)=N	+
*C(C)=N	+
*C(C)=[N+]	++
*C(c)=[N+]	+
*C(C)[Si]	-
*c(c)[se]	+
*C(C)[O-]	+
*c(c)[nH]	+
*c(c)[n+]	+
*C(C)[N+]	+
*C(C)(S)S	+
*C(c)(S)S	+
*C(C)(O)S	+
*C(c)(O)O	+
*C(C)(O)O	+
*C(C)(O)F	+
*C(c)(O)F	+
*C(C)(O)[SiH]	+
*C(C)(n)O	+
*C(C)(N)O	+
*C(C)(N)N	+
*C(C)(F)S	+
*C(c)(F)P	+
*C(c)(F)F	++
*C(C)(F)F	++
*C(C)(F)Br	++
*C(C)(Cl)Cl	++
*C(c)(Cl)Cl	+
*C(C)(C)S	+
*C(c)(c)S	+
*C(C)(c)S	+
*C(C)(C)O	-
*C(c)(c)O	+
*C(c)(C)O	+
*C(C)(C)N	+
*C(C)(c)N	+
*C(c)(c)n	+
*C(C)(C)n	+
*C(c)(c)N	+
*C(C)(c)n	+
*C(C)(C)F	+
*C(C)(c)F	+
*C(c)(c)F	+
*C(C)(C)Cl	+
*C(C)(C)C	-
*C(c)(C)C	-
*C(c)(c)c	+
*C(C)(C)c	+
*C(C)(c)c	-
*C(c)(C)c	-
*C(c)(c)C	-
*C(C)(C)Br	+
*C(C)(c)Br	+
*C(C)(C)[SiH2]	+
*C(C)(C)[Si]	+
*C(C)(C)[N+]	++
*C(=O)S	++
*C(=O)O	++
*C(=O)Cl	-
*C(=O)[O-]	++
*C(=N)S	++
*C(=N)O	+
*C(=N)N	++
*C(=C)S	+
*C(=C)P	+
*C(=C)O	+
*C(=C)N	+
*C(=C)n	+
*C(=c)N	+
*C(=C)F	+
*C(=C)Cl	+
*C(=C)C	+
*C(=c)C	-
*C(=C)c	-
*C(=C)Br	+
*C(=C)[N+]	+
*c([nH])s	+
*c([nH])o	+
*c([nH])n	+
*c([nH])n	+
*c([nH])[nH]	+
*c([n+])n	++
*C#N	++
*C	+
*Br	--
*B(O)O	++
*B(c)O	+
*B(C)O	+
*[Sn](C)(C)C	-
*[Sn](C)(C)c	-
*[SiH3]	-
*[SiH2]O	+
*[SiH2]C	-
*[SiH](C)O	+
*[SiH](c)O	+
*[SiH](C)N	-
*[SiH](C)c	-
*[SiH](c)c	-
*[SiH](C)C	-
*[Si](O)(O)O	+
*[Si](C)(O)O	+
*[Si](C)(C)O	-
*[Si](c)(C)O	+
*[Si](c)(c)O	-
*[Si](C)(c)O	-
*[Si](C)(C)n	+
*[Si](C)(C)N	-
*[Si](C)(C)C	-
*[Si](c)(C)C	-
*[Si](c)(c)C	-
*[Si](C)(C)c	-
*[Si](C)(c)c	-
*[Si](C)(C)[Si]	-
*[Si](C)([Si])[Si]	-
*[Si]([Si])([Si])[Si]	-
*[PH](C)(O)O	+
*[P+](C)(C)C	++
*[P+](C)(c)c	++
*[P+](c)(c)c	++
*[O-]	--
*[N+]=N	++
*[N+]=[N-]	+
*[N+](N)=O	++
*[N+](N)[O-]	+
*[n+](c)n	++
*[n+](c)c	+
*[N+](c)=O	++
*[N+](C)=O	++
*[N+](c)[O-]	++
*[N+](C)[O-]	+
*[N+](C)(C)C	++
*[N+](C)(C)c	+
*[N+](c)(C)C	++
*[N+](=O)O	++
*[N+](=O)[O-]	++
*[N+](=C)c	++
*[N+](=C)C	++
*[N+]([O-])O	+
*[N-]	--
