# Supplementary material for: Retro-MTGR: Molecule Retrosynthesis Prediction via Multi-Task Graph Representation Learning
Source: Research Square preprint supplement (doi:10.21203/rs.3.rs-3205328/v1), 2023-09-06
Supplement: Supplementary file 2 [file 98a888bcdb3f7049ffa82222.xlsx]

## Sheet: Nodes
id	Name	Occurrence	Type
1	H	27623	0
2	Cl	8898	0
3	CCO	306	0
4	CO	316	0
5	CCCCO	7	2
6	[O-]	23	2
7	CC1(C)OBOC1(C)C	914	0
8	Br	7006	0
9	CNC	135	3
10	I	2494	0
11	O=S(=O)(O)C(F)(F)F	177	0
12	CCCC[Sn](CCCC)CCCC	175	3
13	CCO[PH](=O)OCC	81	3
14	O	9247	0
15	C[Si](C)C	19	3
16	OBO	1834	0
17	CO[PH](=O)OC	7	3
18	C[Sn](C)C	35	3
19	[Zn]Br	4	3
20	CC1(C)COBOC1	994	3
21	CNOC	86	3
22	B1OCCCO1	3	3
23	c1ccc([P+](c2ccccc2)c2ccccc2)cc1	114	3
24	[Zn+]	41	3
25	CC(C)OBOC(C)C	5	3
26	[Mg+]	122	3
27	F	640	0
28	[Zn]I	1	3
29	O=C([O-])C1C=COBO1	1	3
30	CC1OBOC1C	1	3
31	B1OCCO1	1	3
32	[Sn]	6	3
33	CC[Si](CC)CC	1	3
34	C[P+](C)C	1	3
35	[Mg]Br	1	3
36	C1CCNCC1	1	3
37	[P+]	20	3
38	B1OBOBO1	4	3
39	CS(=O)(=O)O	274	1
40	O=[SH](=O)O	1	1
41	CCCC[Sn](Cl)(CCCC)CCCC	8	1
42	CCC[SnH](CCC)CCC	1	1
43	OCC(Cl)(Cl)Cl	18	2
44	CC(C)(C)O	45	2
45	C=C1CNC(O)O1	1	2
46	OCc1ccccc1	1	2
47	CC	2	2
48	OC(Cl)(Cl)Cl	1	2
49	CC(C)(C)OC(=O)O	1	2
50	O=[N+]([O-])c1ccc(CO)cc1	1	2
51	OCC(F)(F)F	1	2
52	CC(=O)O	1	2
53	CC(C)(CO)NS(=O)(=O)C(F)(F)F	1	2
54	CCCCCCCCCCCCO	1	2
55	CCOC(=O)O	1	2
56	CC(O)Cl	1	2
57	CN1CC(=O)OBOC(=O)C1	2	3
58	B1OCCN(c2ccccc2)CCO1	1	3
59	c1ccc(P(c2ccccc2)c2ccccc2)cc1	41	3
60	N1C(=O)CCC1(=O)	153	7
61	Cu	15	6

## Sheet: Edges
LG1	LG2	co-occurrence
1	1	1104
1	2	8364
1	3	306
1	4	316
1	5	7
1	6	23
1	7	8
1	8	3946
1	9	81
1	10	2486
1	11	54
1	12	3
1	14	8512
1	16	108
1	23	1
1	24	2
1	26	60
1	27	615
1	35	1
1	39	274
1	40	1
1	43	18
1	44	45
1	45	1
1	46	1
1	47	2
1	48	1
1	49	1
1	50	1
1	51	1
1	52	1
1	53	1
1	54	1
1	55	1
1	56	1
1	59	3
1	60	153
1	61	15
2	2	6
2	7	189
2	8	27
2	10	4
2	12	44
2	15	2
2	16	295
2	18	5
2	19	1
2	20	1
2	24	20
2	26	14
2	28	1
7	8	561
7	10	122
7	11	34
8	8	80
8	9	51
8	10	31
8	12	83
8	15	5
8	16	1109
8	18	22
8	19	3
8	20	6
8	21	49
8	22	3
8	24	14
8	25	4
8	26	16
8	29	1
8	30	1
8	31	1
8	32	6
8	33	1
8	36	1
8	38	4
8	41	8
8	42	1
8	57	2
8	58	1
9	10	3
10	10	12
10	12	28
10	15	10
10	16	186
10	18	6
10	20	1
10	21	5
10	24	5
10	25	1
11	12	17
11	15	2
11	16	64
11	18	1
13	14	81
14	14	12
14	17	7
14	23	113
14	34	1
14	37	20
14	59	38
21	26	30
26	27	2
