# Supplementary material for: Retro-MTGR: Molecule Retrosynthesis Prediction via Multi-Task Graph Representation Learning
Source: Research Square preprint supplement (doi:10.21203/rs.3.rs-3205328/v1), 2023-09-06
Supplement: Supplementary file 3 [file b15ded25f81a472677772076.xlsx]

## Sheet: LG
	LG\Type	1	2	3	4	5	6	7
reaction-common LGs	H	14541	10638	982	144	159	972	188
	O	2297	5610	593	91	79	555	22
	Cl	3878	4048	741	39	0	179	13
	Br	4645	56	2241	1	0	63	0
	I	1948	0	546	0	0	0	0
	OBO	147	0	1687	0	0	0	0
	CC1(C)OBOC1(C)C	0	0	914	0	0	80	0
	F	623	15	2	0	0	0	0
	CO	0	251	0	1	64	0	0
	CCO	0	294	0	12	0	0	0
	O=S(=O)(O)C(F)(F)F	44	0	133	0	0	0	0
reaction-specific LGs	CS(=O)(=O)O	274	0	0	0	0	0	0
	CCCC[Sn](CCCC)CCCC	0	0	175	0	0	0	0
	NC1(=O)CCC1(=O)	0	0	0	0	0	0	153
	CNC	0	0	135	0	0	0	0
	[Mg+]	0	0	122	0	0	0	0
	c1ccc([P+](c2ccccc2)c2ccccc2)cc1	0	0	114	0	0	0	0
	CNOC	0	0	86	0	0	0	0
	CCO[PH](=O)OCC	0	0	81	0	0	0	0
	CC(C)(C)O	0	45	0	0	0	0	0
	c1ccc(P(c2ccccc2)c2ccccc2)cc1	0	0	41	0	0	0	0
	[Zn+]	0	0	41	0	0	0	0
	C[Sn](C)C	0	0	35	0	0	0	0
	[O-]	0	23	0	0	0	0	0
	[P+]	0	0	20	0	0	0	0
	CCCC[Sn](Cl)(CCCC)CCCC	19	0	0	0	0	0	0
	C[Si](C)C	0	0	19	0	0	0	0
	OCC(Cl)(Cl)Cl	0	18	0	0	0	0	0
	Cu	0	0	0	0	0	15	0
	CC1(C)COBOC1	0	0	8	0	0	0	0
	CCCCO	0	7	0	0	0	0	0
	CO[PH](=O)OC	0	0	7	0	0	0	0
	[Sn]	0	0	6	0	0	0	0
	CC(C)OBOC(C)C	0	0	5	0	0	0	0
	B1OBOBO1	0	0	4	0	0	0	0
	[Zn]Br	0	0	4	0	0	0	0
	B1OCCCO1	0	0	3	0	0	0	0
	O=[SH](=O)O	1	0	0	0	0	0	0
	CCC[SnH](CCC)CCC	1	0	0	0	0	0	0
	CC	0	2	0	0	0	0	0
	CN1CC(=O)OBOC(=O)C1	0	0	2	0	0	0	0
	C1CCNCC1	0	0	1	0	0	0	0
	OCc1ccccc1	0	1	0	0	0	0	0
	OCC(F)(F)F	0	1	0	0	0	0	0
	OC(Cl)(Cl)Cl	0	1	0	0	0	0	0
	O=[N+]([O-])c1ccc(CO)cc1	0	1	0	0	0	0	0
	CCOC(=O)O	0	1	0	0	0	0	0
	CCCCCCCCCCCCO	0	1	0	0	0	0	0
	CC(O)Cl	0	1	0	0	0	0	0
	CC(C)(CO)NS(=O)(=O)C(F)(F)F	0	1	0	0	0	0	0
	CC(C)(C)OC(=O)O	0	1	0	0	0	0	0
	CC(=O)O	0	1	0	0	0	0	0
	C=C1CNC(O)O1	0	1	0	0	0	0	0
	O=C([O-])C1C=COBO1	0	0	1	0	0	0	0
	CC1OBOC1C	0	0	1	0	0	0	0
	CC[Si](CC)CC	0	0	1	0	0	0	0
	C[P+](C)C	0	0	1	0	0	0	0
	B1OCCO1	0	0	1	0	0	0	0
	B1OCCN(c2ccccc2)CCO1	0	0	1	0	0	0	0
	[Zn]I	0	0	1	0	0	0	0
	[Mg]Br	0	0	1	0	0	0	0
